# Supplementary material
Source: PubMed Central journal article supplement (PMC6046274)

Fig. S1 (related to Fig. 1)

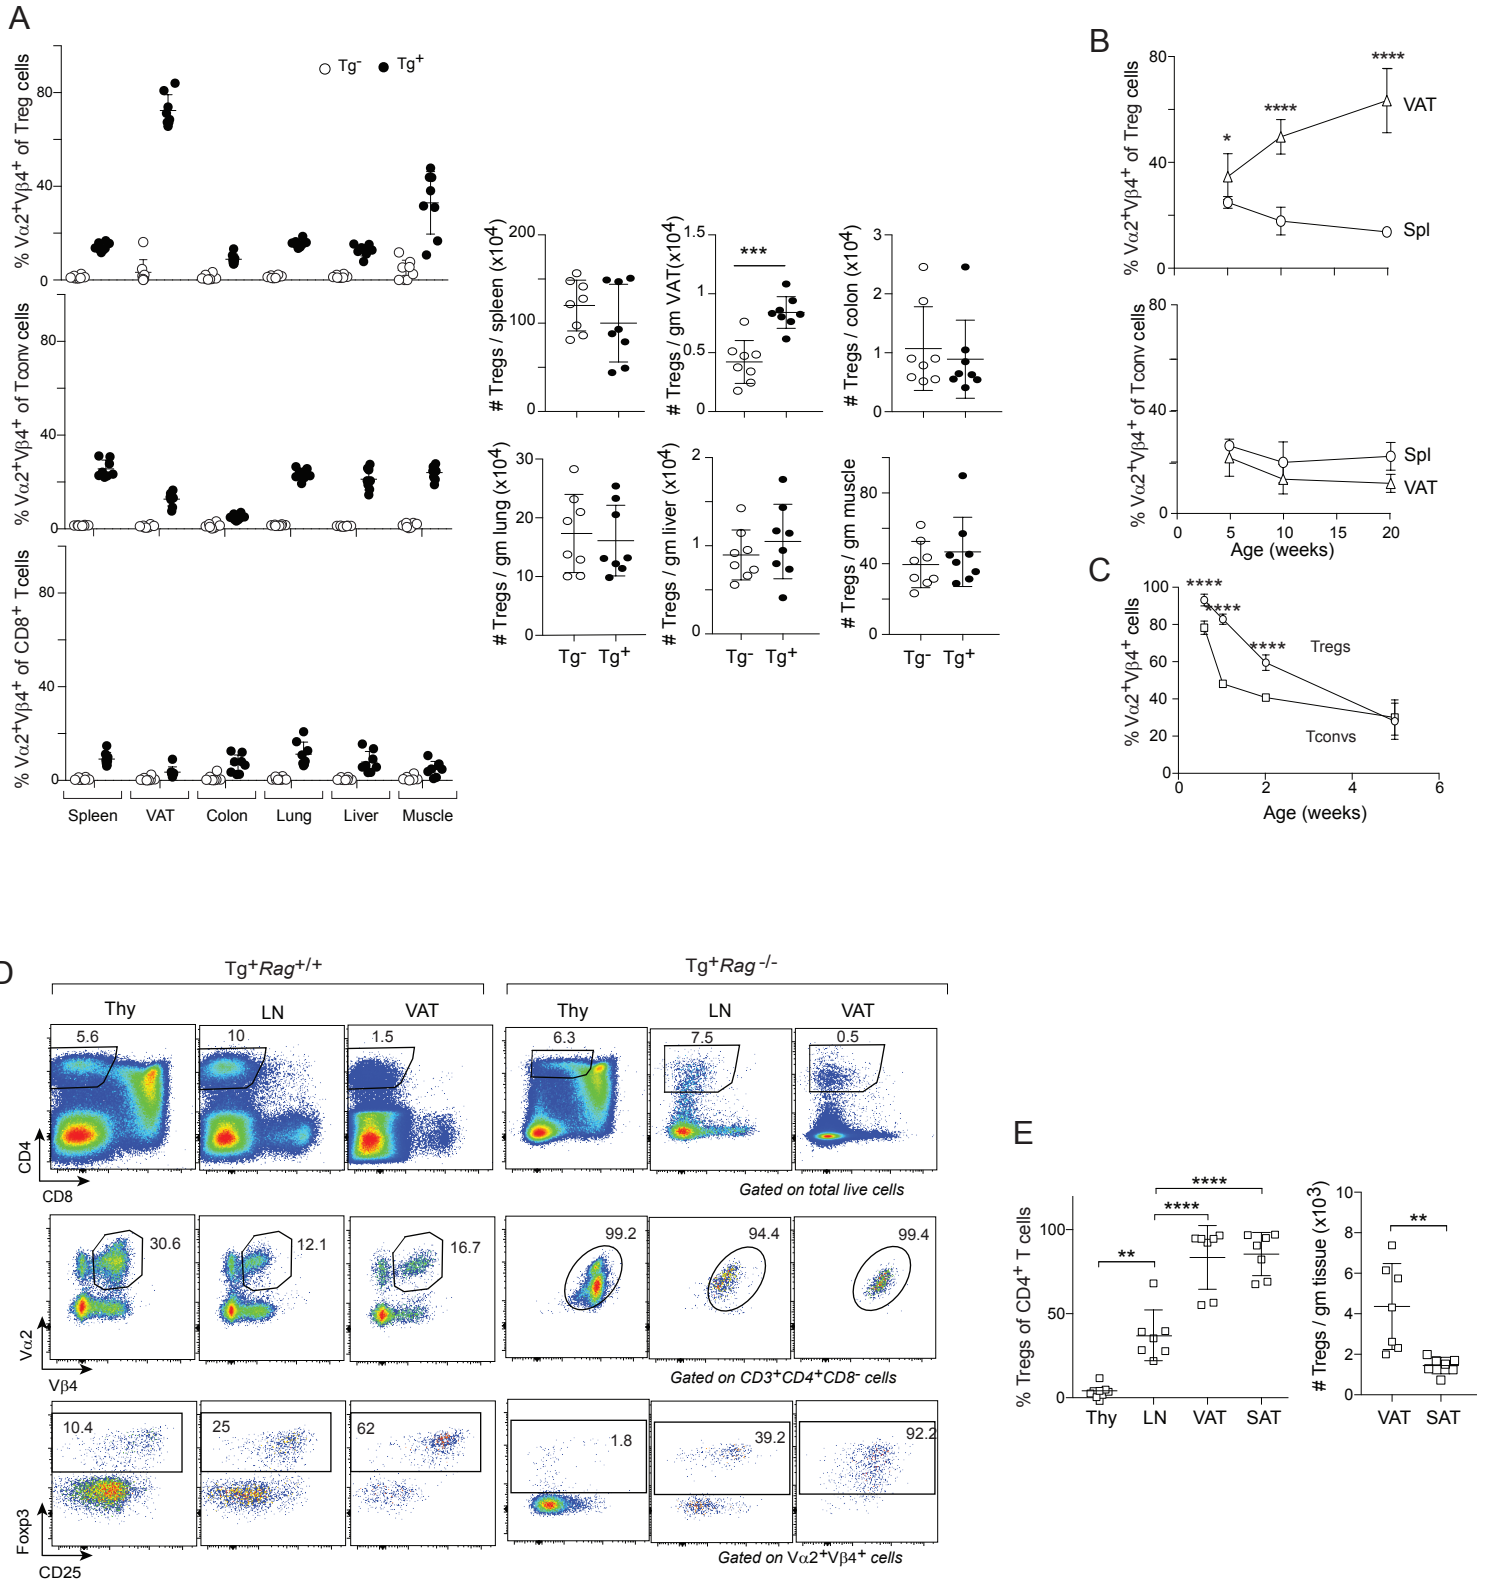

Supplement: NIHMS971630-supplement-1.pdf [file NIHMS971630-supplement-1.pdf]

Fig. S2 (related to Fig. 1)

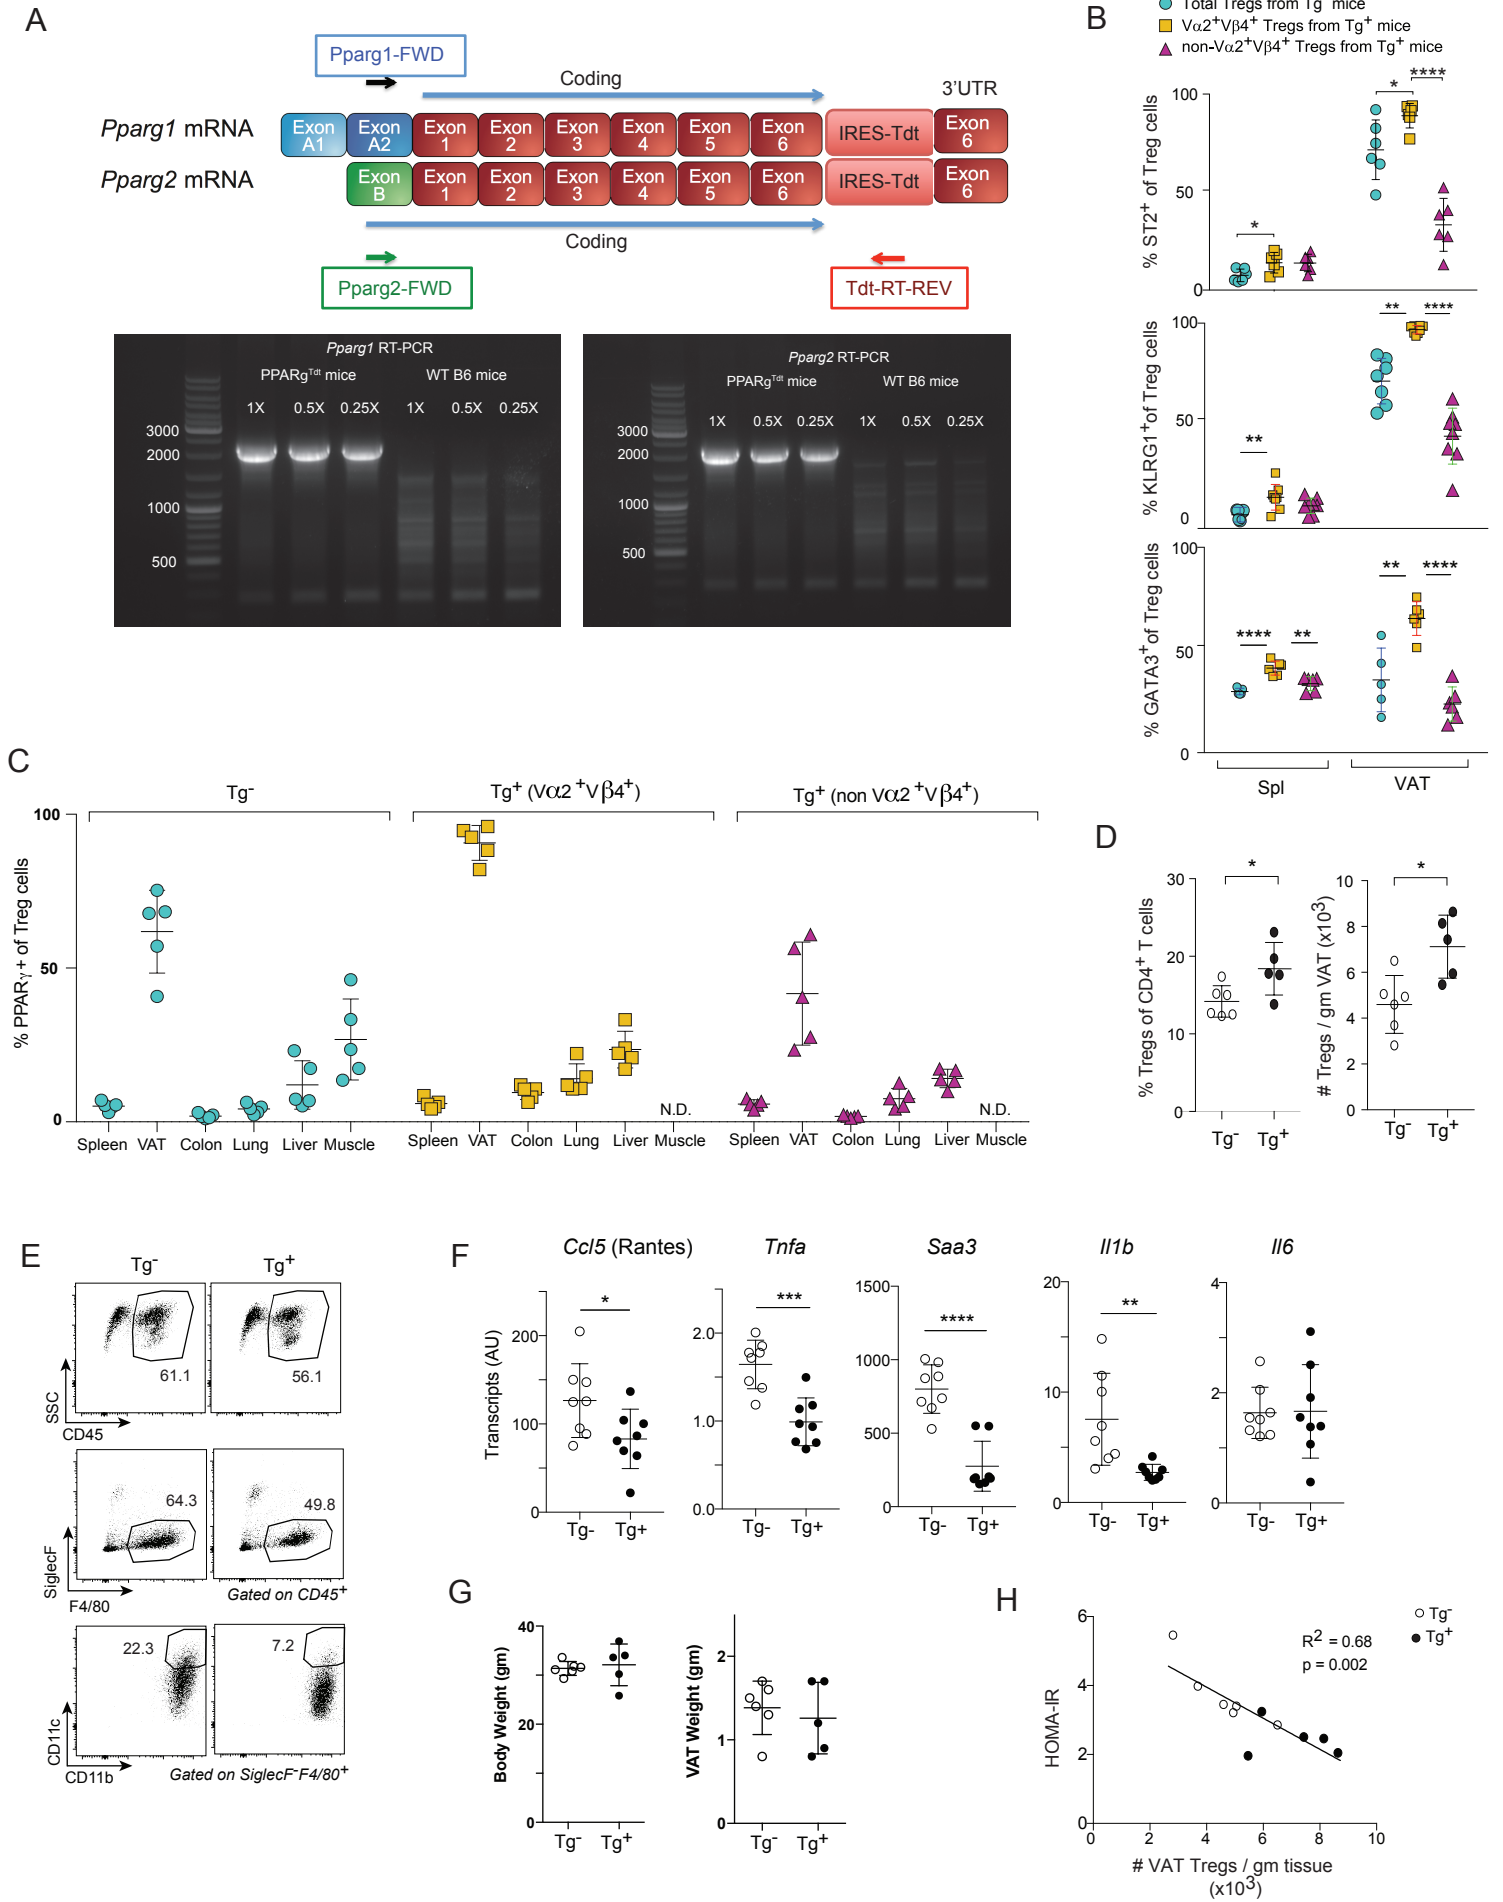

Supplement: NIHMS971630-supplement-2.pdf [file NIHMS971630-supplement-2.pdf]

Fig. S3 (related to Fig. 4)

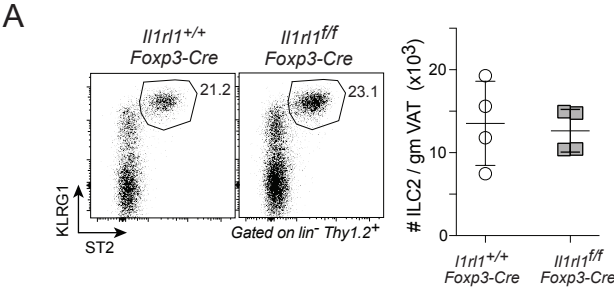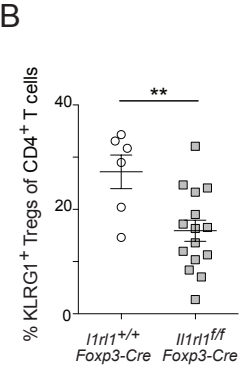

Supplement: NIHMS971630-supplement-3.pdf [file NIHMS971630-supplement-3.pdf]

Fig. S4 (related to Fig. 5)

A

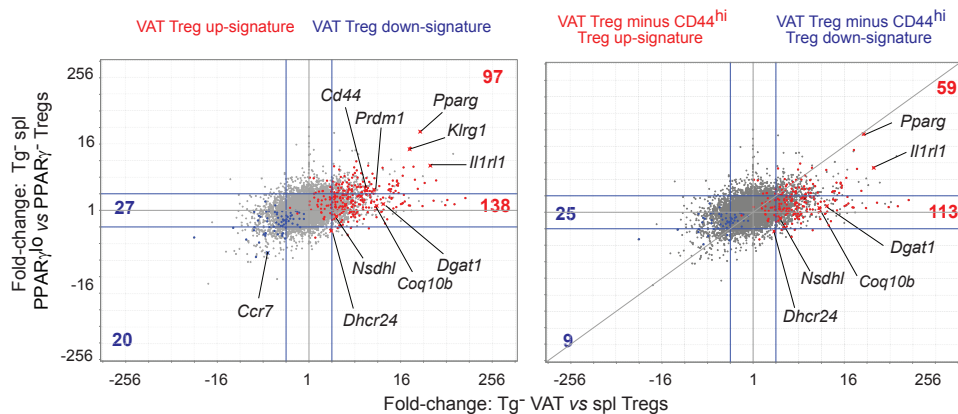

B

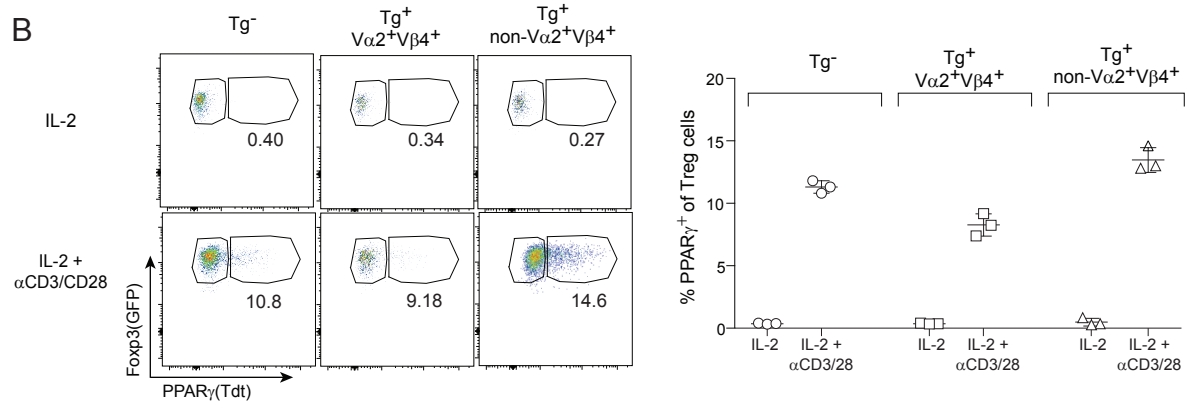

Supplement: NIHMS971630-supplement-4.pdf [file NIHMS971630-supplement-4.pdf]

Fig. S5 (Related to Fig. 7)

A

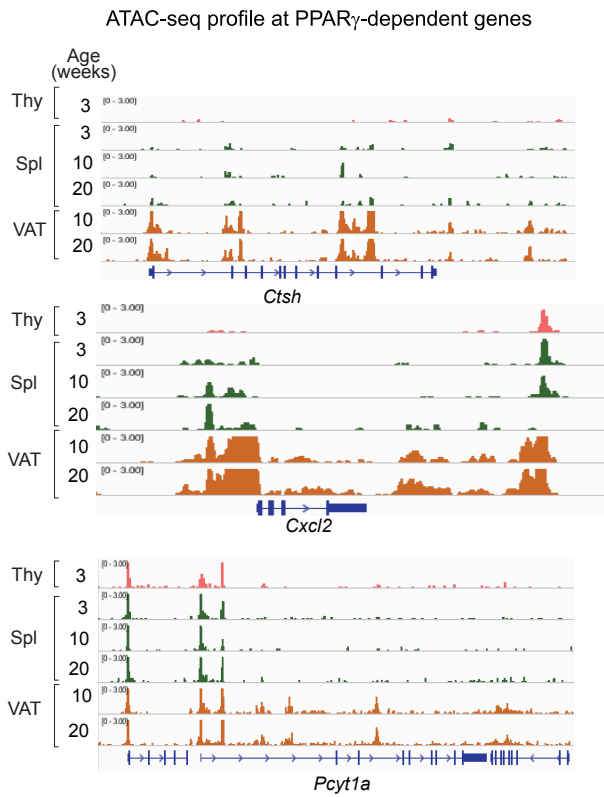

B

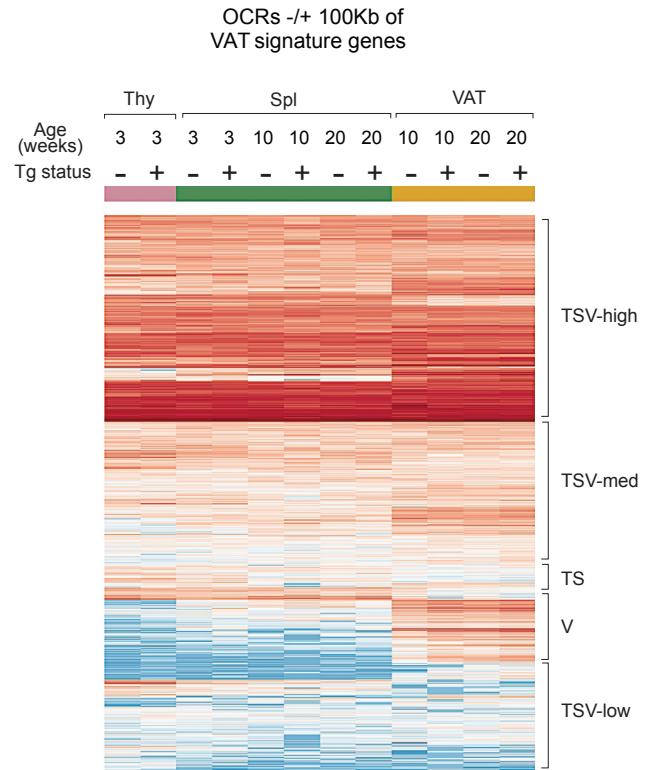

Supplement: NIHMS971630-supplement-5.pdf [file NIHMS971630-supplement-5.pdf]
